# Supplementary material
Source: publisher figshare collection journal article supplement (https://frontiersin.figshare.com/ndownloader/files/14876549)
Supplement: Supplementary file 1 [file 14876549]

## Supplementary Material

# Optimal Active Control of Structures Using a Screw Jack Device and Open-Loop Linear Quadratic Gaussian Controller

Ali Noormohamed<sup>1\*</sup>, Oya Mercan<sup>1</sup>, Ali Ashasi-Sorkhabi<sup>1</sup>

<sup>1</sup>Department of Civil and Mineral Engineering, University of Toronto, Toronto, ON, Canada

\* Correspondence:

Ali Noormohamed

ali.noormohamed@alum.utoronto.ca

## 1 Supplementary Figures and Tables

### 1.1 Supplementary Figures

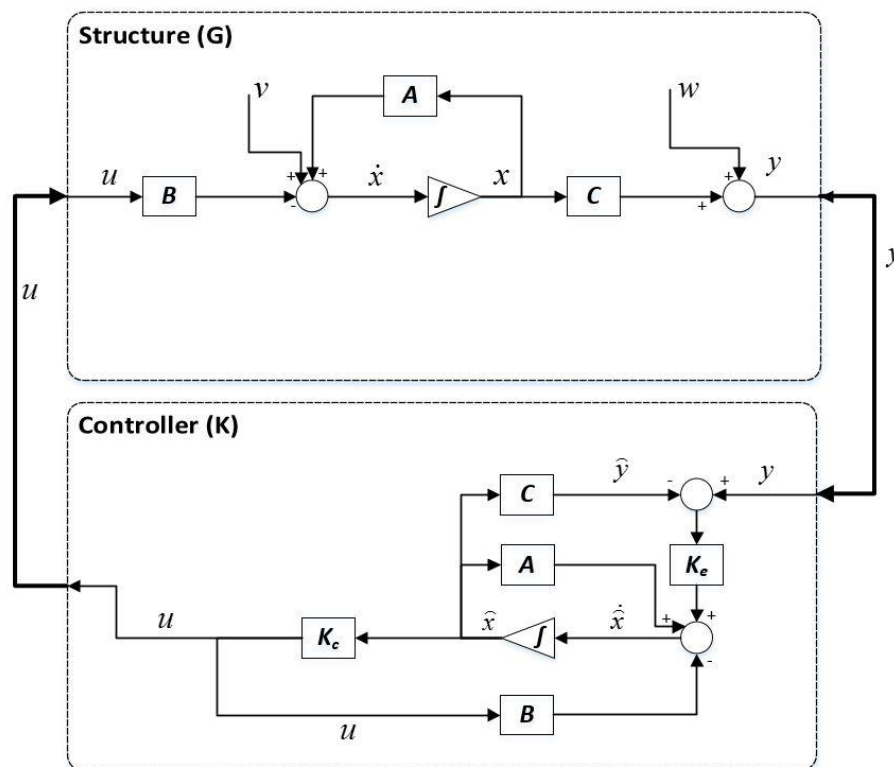

**Supplementary - Figure S1.** Schematic representation of LQG controller used in experiments.

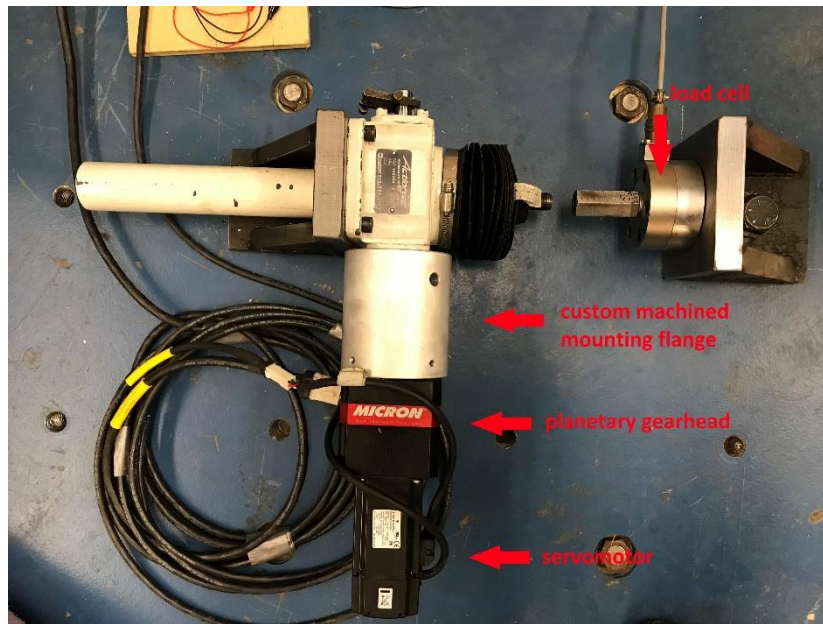

**Supplementary - Figure S2:** Screw jack experimental setup at the University of Toronto.

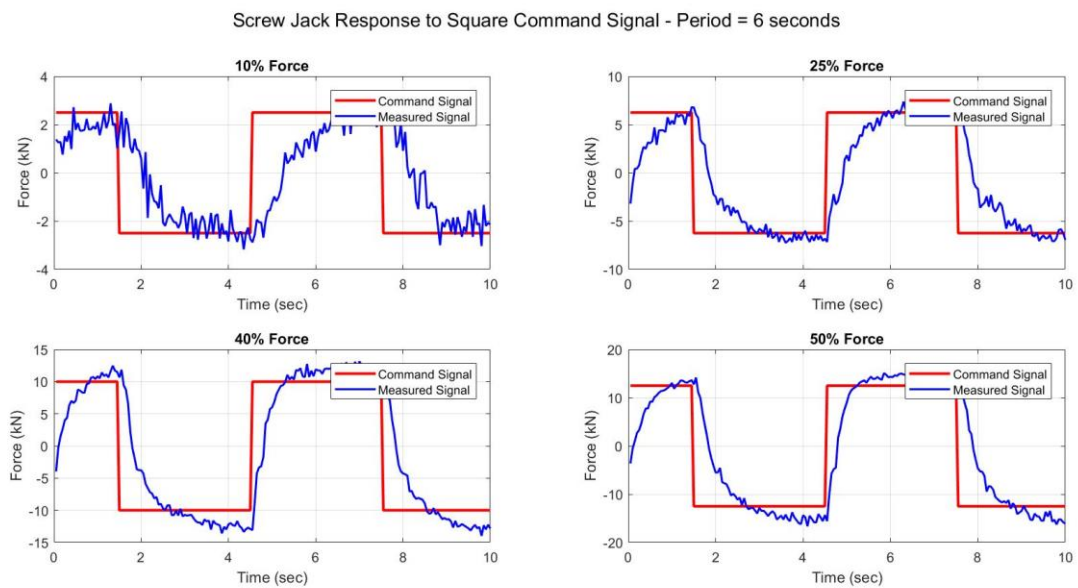

**Supplementary - Figure S3.** Screw jack characterization tests: square wave force command, period = 6.0 sec.

Screw Jack Response to Square Command Signal - Period = 2 seconds

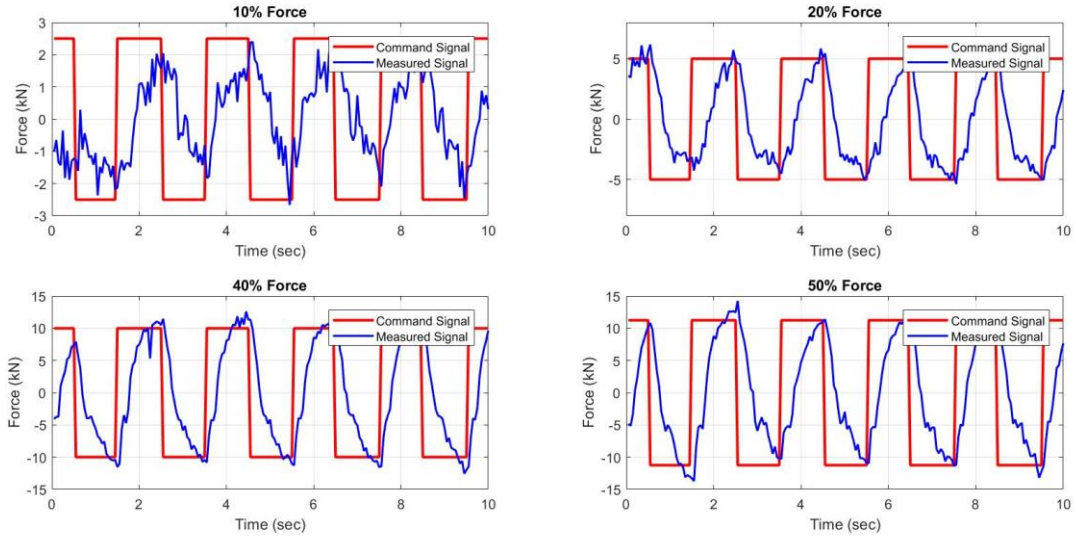

**Supplementary - Figure S4.** Screw jack characterization tests: square wave force command, period = 2.0 sec.

Screw Jack Response to Square Command Signal - Period = 1.5 seconds

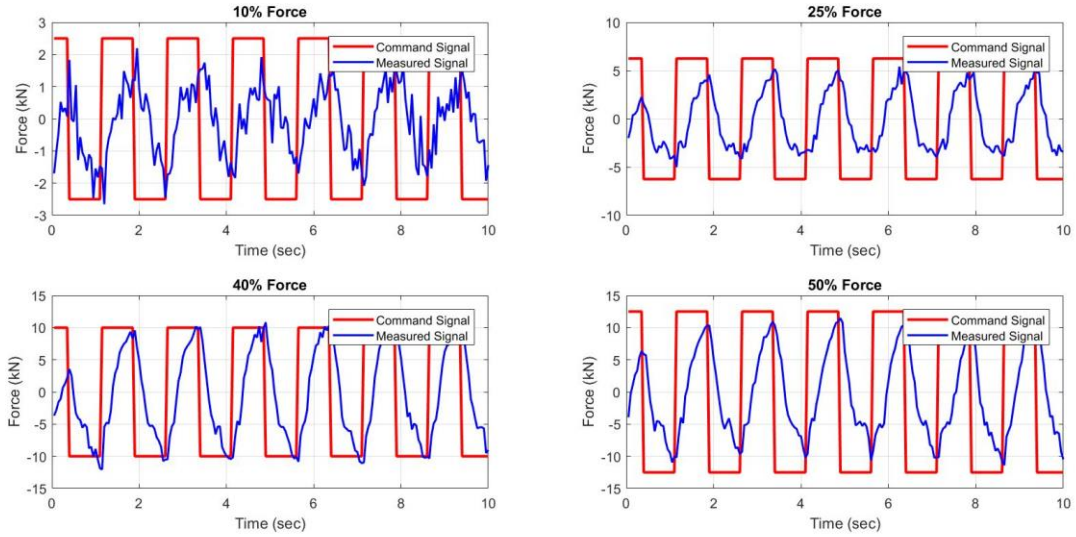

**Supplementary - Figure S5.** Screw jack characterization tests: square wave force command, period = 1.5 sec.

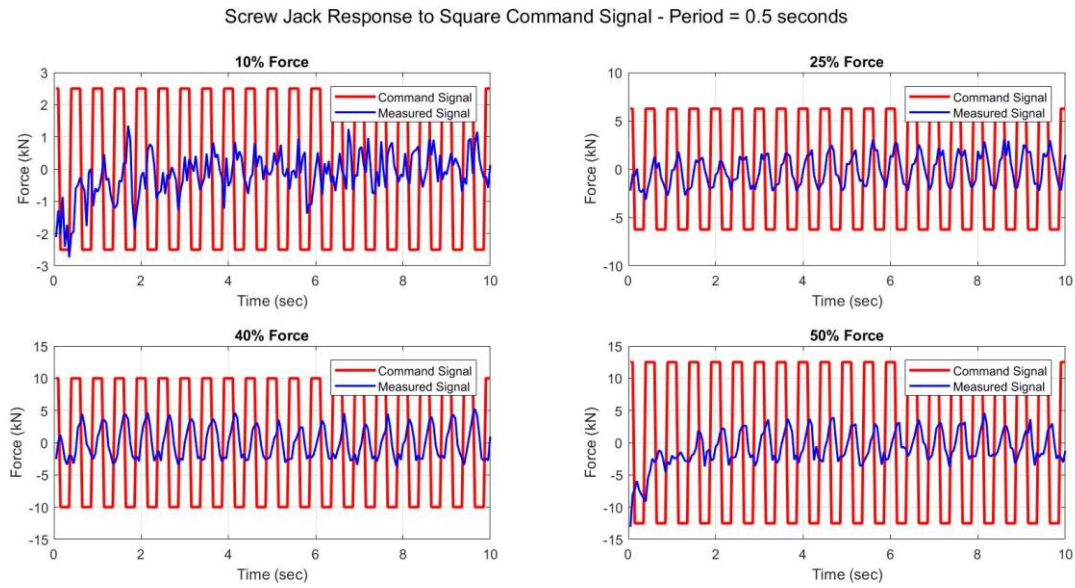

**Supplementary - Figure S6.** Screw jack characterization tests: square wave force command, period = 0.5 sec.

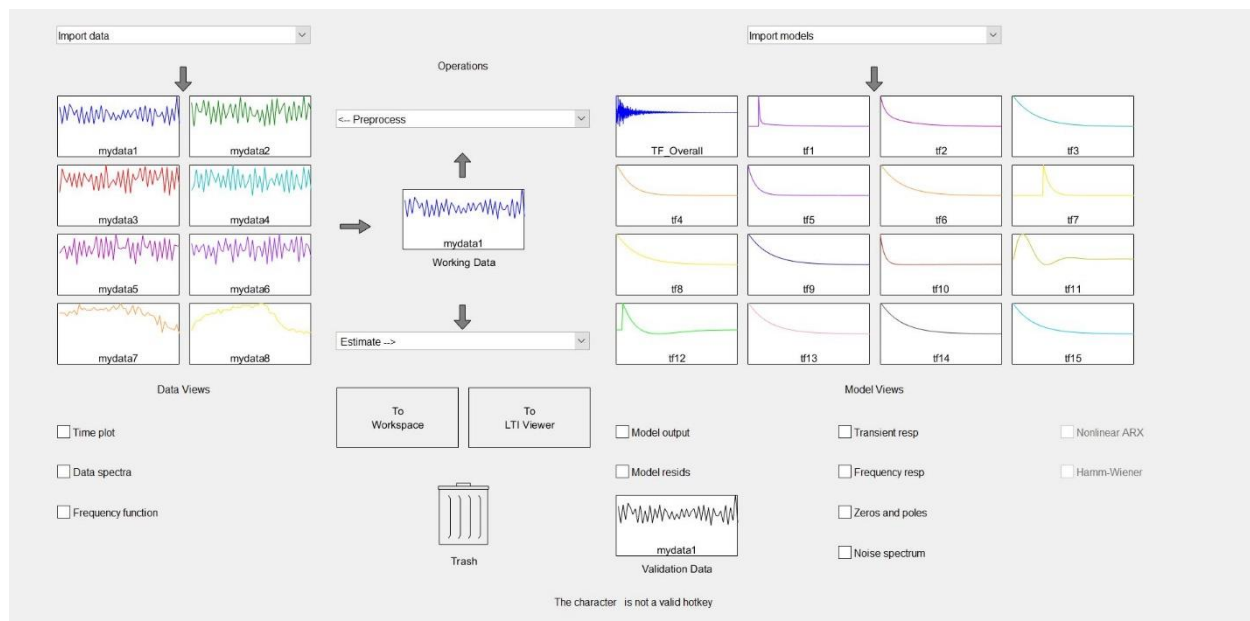

**Supplementary - Figure S7.** Screenshot of Matlab's System Identification app being used to calculate transfer functions for various input-output datasets.



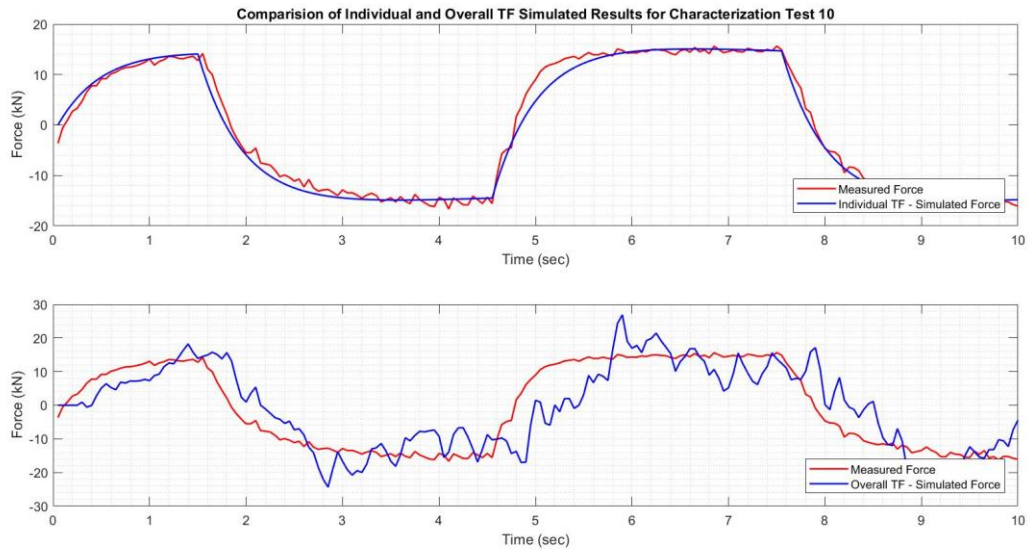

**Supplementary - Figure S8.** Screenshot of Matlab's System Identification app being used to calculate transfer functions for various input-output datasets.

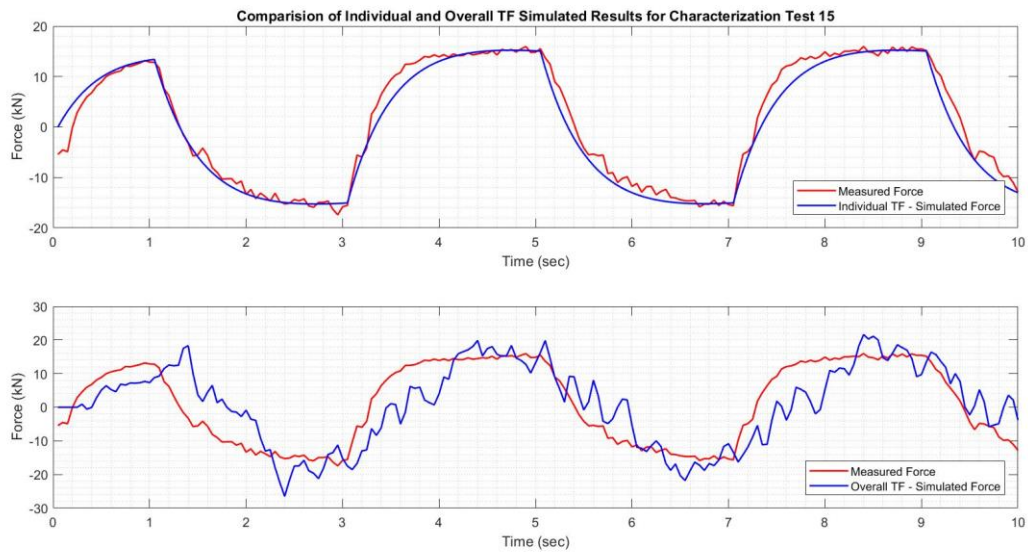

**Supplementary - Figure S9.** Screenshot of Matlab's System Identification app being used to calculate transfer functions for various input-output datasets.

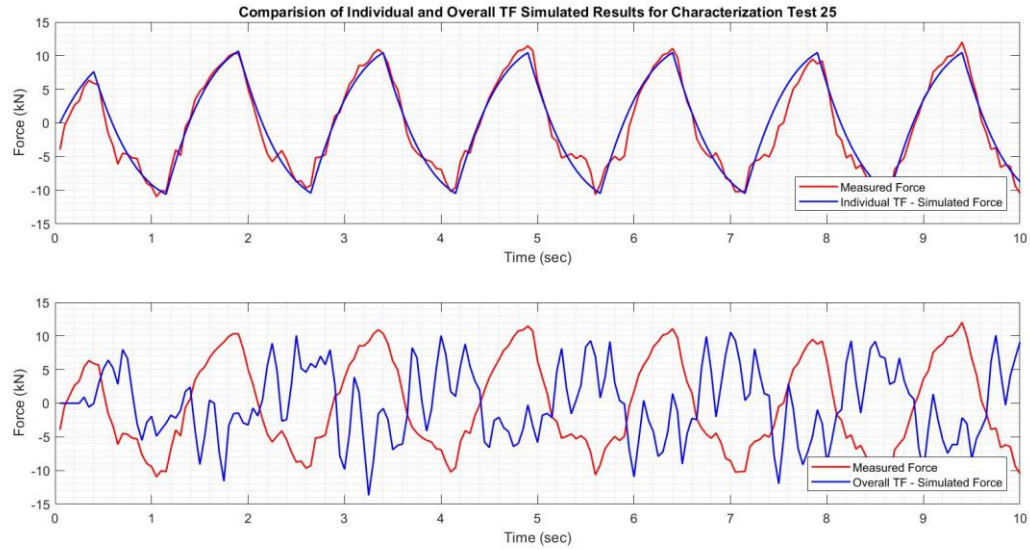

**Supplementary - Figure S10.** Screenshot of Matlab's System Identification app being used to calculate transfer functions for various input-output datasets.

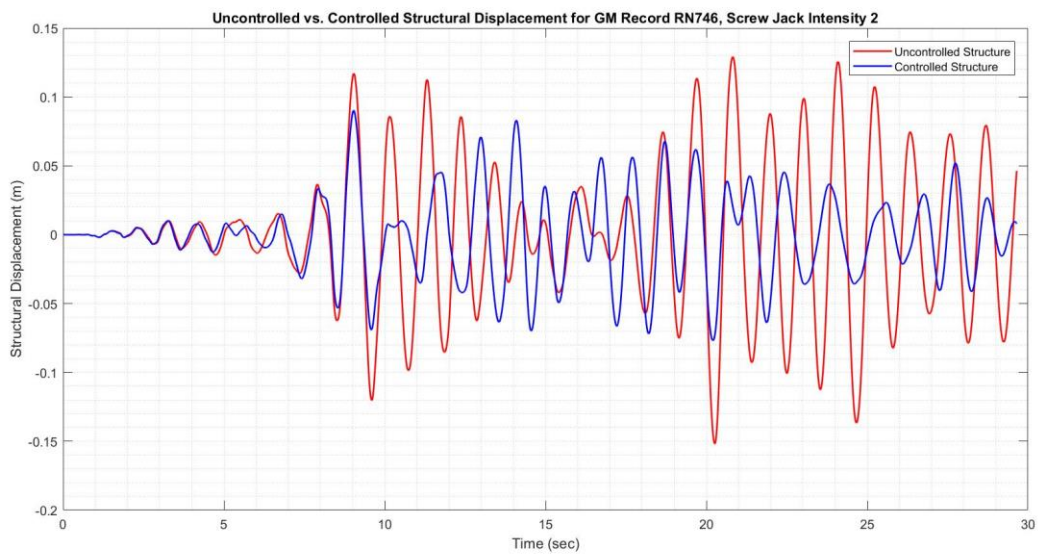

**Supplementary - Figure S11.** Structural displacement of SDOF structure subjected to ground motion record # 746 with and without screw jack (scenario 2), calculated using numerical methods.

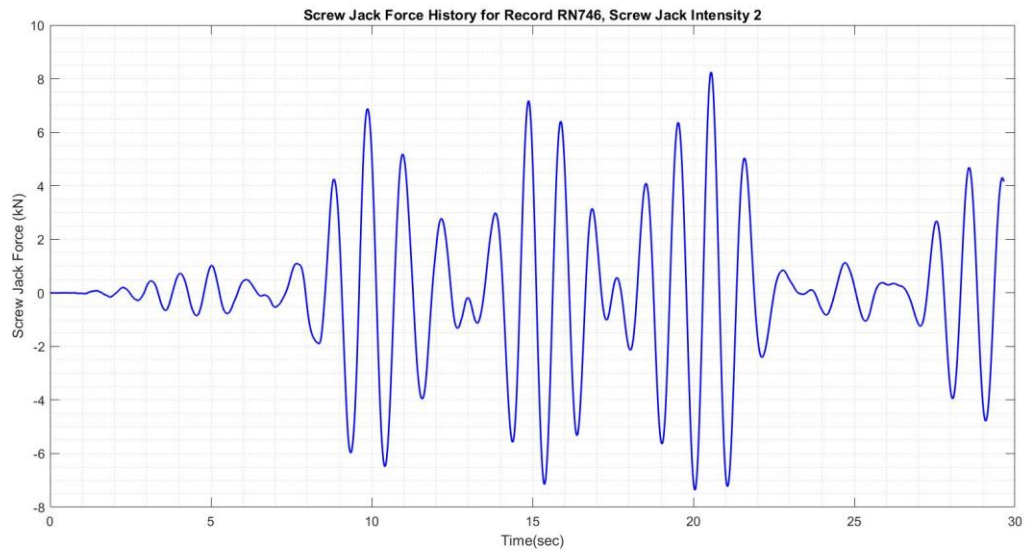

**Supplementary - Figure S12.** Screw jack force history required for control of SDOF structure subjected to ground motion record # 746 (scenario 2).

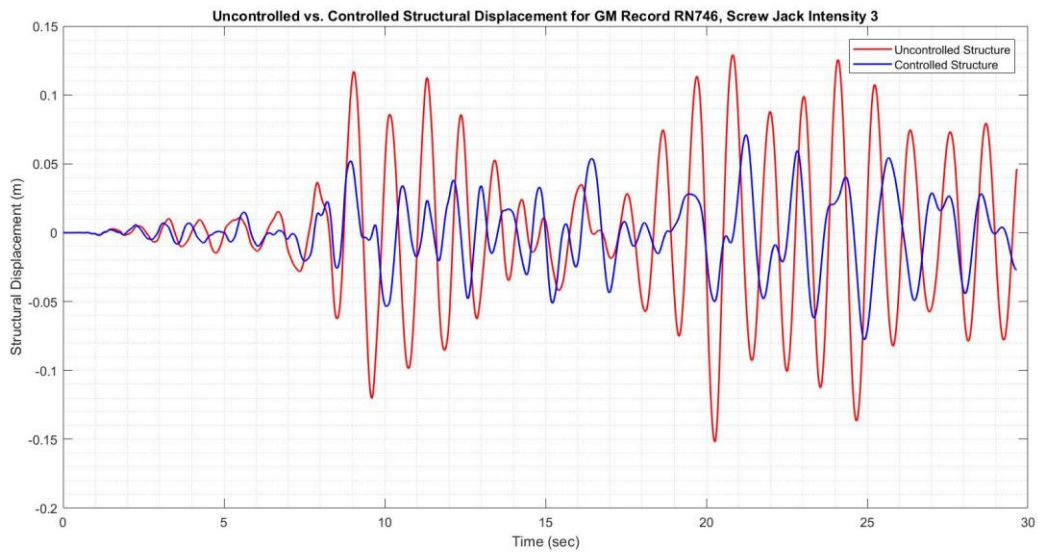

**Supplementary - Figure S13.** Structural displacement of SDOF structure subjected to ground motion record # 746 with and without screw jack (scenario 3), calculated using numerical methods.

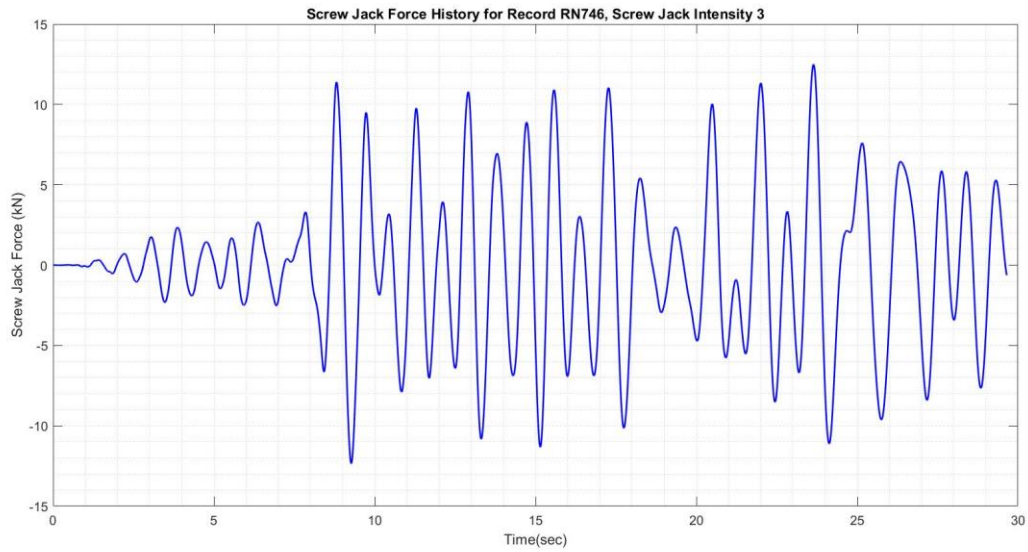

**Supplementary - Figure S14.** Screw jack force history required for control of SDOF structure subjected to ground motion record # 746 (scenario 3).



## 1.2 Supplementary Tables

**Table S1: Summary of ground motion records.**

| <b>Record #</b> | <b>Earthquake Name &amp; Year</b> | <b>Station Name</b>       | <b>PGA (g)</b> | <b>Total Time (sec)</b> | <b>Scale Factor</b> |
|-----------------|-----------------------------------|---------------------------|----------------|-------------------------|---------------------|
| 746             | Loma Prieta 1989                  | Bear Valley #5            | 0.286          | 29.655                  | 4.2                 |
| 774             | Loma Prieta 1989                  | Hayward City Hall – North | 0.328          | 39.455                  | 6.7                 |
| 975             | Northridge 1994                   | Glendora – N Oakbank      | 0.301          | 30.00                   | 6.5                 |
| 3202            | Chi Chi 1999                      | TCU102                    | 0.316          | 79.00                   | 7.5                 |
| 3859            | Chi Chi 1999                      | CHY006                    | 0.383          | 98.00                   | 4.0                 |
| 6949            | Darfield 2010                     | PEEC                      | 0.366          | 59.55                   | 3.0                 |
| 6963            | Darfield 2010                     | RPZ                       | 0.310          | 150.00                  | 6.5                 |

**Table S2: Summary of LQG cost scenarios.**

| <b>Case Name</b> | <b>Structural Response Cost</b> | <b>Control Effort Cost</b> |
|------------------|---------------------------------|----------------------------|
| Optimal          | High                            | Low                        |
| 1                | Low                             | High                       |
| 2                | Low                             | Medium                     |
| 3                | Medium                          | Medium                     |

**Table S3: Summary of rise time, settling time, for impulse characterization tests.**

| <b>Test Number</b> | <b>Loading Type</b> | <b>Magnitude (% SJ capacity)</b> | <b>Rise Time (sec)</b> | <b>Settling Time (sec)</b> |
|--------------------|---------------------|----------------------------------|------------------------|----------------------------|
| <b>1</b>           | Impulse             | 15                               | 0.47                   | 0.75                       |
| <b>2</b>           | Impulse             | 25                               | 0.89                   | 1.0                        |
| <b>3</b>           | Impulse             | 35                               | 0.71                   | 0.94                       |
| <b>4</b>           | Impulse             | 60                               | 0.69                   | 1.0                        |
| <b>5</b>           | Impulse             | 70                               | 0.68                   | 1.2                        |
| <b>6</b>           | Impulse             | 80                               | 0.42                   | 0.7                        |

**Table S4: Transfer function simulation error for characterization tests.**

| <b>Test Number</b> | <b>Loading Type</b> | <b>Loading Frequency (Hz)</b> | <b>Loading Amplitude (% SJ capacity)</b> | <b>Individual TF RMS % Error</b> | <b>Overall TF RMS % Error</b> |
|--------------------|---------------------|-------------------------------|------------------------------------------|----------------------------------|-------------------------------|
| 1                  | Step load           | N/A                           | 15%                                      | 6.12%                            | 7.40%                         |
| 2                  | Step load           | N/A                           | 25%                                      | 2.83%                            | 4.83%                         |
| 3                  | Step load           | N/A                           | 35%                                      | 2.14%                            | 4.33%                         |
| 4                  | Step load           | N/A                           | 60%                                      | 1.15%                            | 3.98%                         |
| 5                  | Step load           | N/A                           | 70%                                      | 0.99%                            | 4.11%                         |
| 6                  | Step load           | N/A                           | 80%                                      | 0.93%                            | 4.68%                         |
| 7                  | Square wave         | 0.1667                        | 10%                                      | 12.08%                           | 13.04%                        |
| 8                  | Square wave         | 0.1667                        | 25%                                      | 2.73%                            | 12.19%                        |
| 9                  | Square wave         | 0.1667                        | 40%                                      | 2.70%                            | 14.65%                        |
| 10                 | Square wave         | 0.1667                        | 50%                                      | 3.06%                            | 14.10%                        |
| 11                 | Square wave         | 0.25                          | 10%                                      | 30.04%                           | 130.82%                       |
| 12                 | Square wave         | 0.25                          | 25%                                      | 2.34%                            | 5.23%                         |
| 13                 | Square wave         | 0.25                          | 40%                                      | 2.43%                            | 7.97%                         |
| 14                 | Square wave         | 0.25                          | 50%                                      | 2.51%                            | 12.65%                        |

|    |             |       |     |        |         |
|----|-------------|-------|-----|--------|---------|
| 15 | Square wave | 0.50  | 10% | 21.58% | 73.74%  |
| 16 | Square wave | 0.50  | 20% | 13.87% | 61.35%  |
| 17 | Square wave | 0.50  | 40% | 1.70%  | 6.85%   |
| 18 | Square wave | 0.50  | 50% | 2.19%  | 12.48%  |
| 19 | Square wave | 0.667 | 10% | 16.22% | 140.83% |
| 20 | Square wave | 0.667 | 25% | 7.10%  | 58.61%  |
| 21 | Square wave | 0.667 | 40% | 9.24%  | 43.19%  |
| 22 | Square wave | 0.667 | 50% | 1.05%  | 3.72%   |
| 23 | Square wave | 1.0   | 10% | 9.74%  | 51.75%  |
| 24 | Square wave | 1.0   | 25% | 5.82%  | 41.34%  |
| 25 | Square wave | 1.0   | 40% | 3.94%  | 27.30%  |
| 26 | Square wave | 1.0   | 50% | 5.49%  | 15.64%  |
| 27 | Square wave | 2.0   | 10% | 4.94%  | 11.91%  |
| 28 | Square wave | 2.0   | 25% | 3.74%  | 11.89%  |
| 29 | Square wave | 2.0   | 40% | 4.11%  | 12.10%  |
| 30 | Square wave | 2.0   | 50% | 4.17%  | 11.73%  |
